# Supplementary material
Source: Copernicus journal article supplement (doi:10.5194/essd-18-4793-2026)
Supplement: Supplementary file 1 [file essd-18-4793-2026-supplement.pdf]

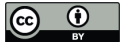

*Supplement of*

**A global dataset of  $\delta^{13}\text{C}$ - $\text{CH}_4$  source signatures and associated uncertainties (1998–2022), with a sensitivity analysis to support isotopic inversions**

**Emeline Tapin et al.**

*Correspondence to:* Emeline Tapin (emeline.tapin@lsce.ipsl.fr)

The copyright of individual parts of the supplement might differ from the article licence.

## S1 Additional methods

### S1.1 Stable carbon isotope reference scale

All  $\delta^{13}\text{C}\text{-CH}_4$  values reported in this study are expressed relative to the Vienna Pee Dee Belemnite (VPDB) standard, the internationally accepted reference for stable carbon isotope ratios. Historically, earlier atmospheric  $\delta^{13}\text{C}\text{-CH}_4$  simulations  
5 used the Pee Dee Belemnite (PDB) reference scale defined by Craig (1957), where  $R_{\text{PDB}} = 1.12372 \times 10^{-2}$  is the standard  $^{13}\text{C}/^{12}\text{C}$  ratio. The current VPDB scale adopts a slightly different value,  $R_{\text{VPDB}} = 0.0111113 \pm 0.000022$  (95% confidence level; Camin et al. 2025).

To assess the consistency between these reference scales, we repeated our model calculations using the updated VPDB  
standard. The resulting differences in  $\delta^{13}\text{C}\text{-CH}_4$  outputs were negligible, with a mean offset of less than  $-6\text{e-}5\%$  over the  
10 24-year simulation period. This confirms that the choice of reference standard does not materially affect the results presented in this work.

### S1.2 Method for aggregating isotopic signatures from sub-sectors into sectors

The aggregation of isotopic signatures from sub-sectors into sectoral values was performed using a mass-weighted approach  
based on the underlying carbon isotopic ratios. When fluxes are provided in mass units rather than moles, appropriate molar  
15 mass ratios are applied to ensure consistency. The procedure is as follows:

For each sub-sector  $i$ :

1. The isotopic signature  $\delta^{13}\text{C}_i$  is first converted to the corresponding isotopic ratio  $R_i$  relative to the VPDB standard:

$$R_i = \left(1 + \frac{\delta^{13}\text{C}_i}{1000}\right) R_{\text{PDB}},$$

where  $R_{\text{PDB}}$  is the reference  $^{13}\text{C}/^{12}\text{C}$  ratio of the Pee Dee Belemnite (PDB) standard.

2. The partial fluxes of  $^{12}\text{CH}_4$  and  $^{13}\text{CH}_4$  for each sub-sector are then calculated as:

$$F_{12,i} = \frac{F_{\text{total},i} M_{12\text{C}}/M_{\text{CH}_4}}{1 + R_i} \quad F_{13,i} = \frac{F_{\text{total},i} R_i M_{13\text{C}}/M_{\text{CH}_4}}{1 + R_i},$$

where  $F_{\text{total},i}$  is the total methane flux for subcategory  $i$  (in mass units), and  $M_{12\text{C}}$ ,  $M_{13\text{C}}$  and  $M_{\text{CH}_4}$  are the molar masses of  $^{12}\text{C}$ ,  $^{13}\text{C}$  and  $\text{CH}_4$ , respectively.

3. The fluxes are then summed over all subcategories within a given sector  $s$ :

$$25 \quad F_{12}^s = \sum_i F_{12,i}, \quad F_{13}^s = \sum_i F_{13,i}.$$

4. The aggregated isotopic ratio for the sector is calculated as:

$$R^s = \frac{F_{13}^s}{F_{12}^s}.$$

5. Finally, the aggregated isotopic signature for the sector is computed as:

$$\delta^{13}\text{C}^s = \left[ \frac{R^s}{R_{\text{PDB}}} \frac{M_{12\text{C}}}{M_{13\text{C}}} - 1 \right] \times 1000.$$

30 This approach ensures that the aggregated isotopic signature is correctly weighted by the contribution of each subsector to the total flux of the sector.

## S2 Supplementary tables

### S2.1 List of acronyms and datasets used in this study

**Table S1.** List of acronyms used in this study.

| <b>Acronym</b> | <b>Definition / Source</b>                                                                        |
|----------------|---------------------------------------------------------------------------------------------------|
| CIF            | Community Inversion Framework                                                                     |
| VPDB           | Vienna Pee Dee Belemnite (standard for stable carbon isotope ratios)                              |
| KIE            | Kinetic Isotope Effect                                                                            |
| FFG            | Fossil Fuel exploitation and Geological sources                                                   |
| AGW            | Agriculture and Waste                                                                             |
| BB             | Biomass and Biofuel Burning                                                                       |
| WET            | Wetlands                                                                                          |
| NAT            | Other Natural Sources                                                                             |
| EDGARv8        | Emissions Database for Global Atmospheric Research (Crippa et al., 2023)                          |
| GFED4s         | Global Fire Emissions Database (van Wees et al., 2022)                                            |
| GMB            | Global Methane Budget (Martinez et al., 2024; Saunio et al., 2025)                                |
| EMID           | European Methane Isotope Database (Menoud et al., 2024)                                           |
| GFEIv2         | Global Fuel Exploitation Inventory (Scarpelli et al., 2022)                                       |
| CEDSv2021      | Community Emissions Data System (O'Rourke et al., 2021)                                           |
| GAINsv4        | Greenhouse Gas and Air Pollution Interactions and Synergies model (Höglund-Isaksson et al., 2020) |
| RSD            | Relative Standard Deviation                                                                       |
| SD             | Standard Deviation                                                                                |

## S2.2 European fossil-fuels isotopic signature aggregation

**Table S2.** Country-level weighted mean  $\delta^{13}\text{C-CH}_4$  values (‰) for oil & gas and coal emissions in Europe, derived from data compiled by Lan et al. (2021) and Menoud et al. (2022).  $N$  indicates the number of individual measurements contributing to each dataset. A weighted mean is calculated when data from both sources are available.

| Country              | $\delta^{13}\text{C-CH}_4$ (Lan et al., 2021) (‰) / $N$ | $\delta^{13}\text{C-CH}_4$ (Menoud et al., 2022) (‰) / $N$ | Weighted mean (‰) |
|----------------------|---------------------------------------------------------|------------------------------------------------------------|-------------------|
| <b>Oil &amp; Gas</b> |                                                         |                                                            |                   |
| France               | -44.0 / 28                                              | -44.8 / 30                                                 | -44.4             |
| United Kingdom       | -39.2 / 13                                              | -40.2 / 135                                                | -40.1             |
| Germany              | -43.8 / 176                                             | -39.3 / 29                                                 | -43.2             |
| Poland               | -47.0 / 57                                              | -44.9 / 27                                                 | -46.3             |
| Romania              | -48.3 / –                                               | -37.7 / 143                                                | -37.7             |
| Netherlands          | –                                                       | -44.8 / 11                                                 | -44.8             |
| <b>Coal</b>          |                                                         |                                                            |                   |
| United Kingdom       | -40.1 / 23                                              | -48.8 / 4                                                  | -41.2             |
| Germany              | -43.1 / 90                                              | -44.7 / 3                                                  | -43.2             |
| Poland               | -49.5 / 64                                              | -49.2 / 64                                                 | -49.4             |

## 35 S2.3 Monte Carlo ensemble simulations of isotopic source signatures

**Table S3.** Parameters used for the Monte Carlo ensemble simulations of isotopic source signatures. For each of the five main source sectors, normal distributions were defined based on literature-derived mean and standard deviation values (see Section 4.1.3). Five ensemble members were drawn per sector to represent the uncertainty in  $\delta^{13}\text{CH}_4$  source signatures. The table includes sector-specific mean isotopic signatures and their variability, with spatial granularity used for Monte Carlo: 110 countries (Natural Earth dataset, free vector and raster map data at [naturalearthdata.com](http://naturalearthdata.com)) for anthropogenic sectors (FFG, AGW) reflecting country-level variability, and 18 GCP regions (Saunois et al., 2020) for natural sectors (BB, WET, NAT) reflecting coarser regional variability.

| Sector                         | Mean signature [‰] | Standard deviation ( $1\sigma$ ) [%] | Spatial granularity |
|--------------------------------|--------------------|--------------------------------------|---------------------|
| Fossil Fuel & Geological (FFG) | -44.2              | 13.9                                 | 110 countries       |
| Agriculture and Waste (AGW)    | -60.2              | 5.5                                  | 110 countries       |
| Biomass & Biofuel Burning (BB) | -24.3              | 24.9                                 | 18 GCP regions      |
| Wetlands (WET)                 | -58.6              | 12.8                                 | 18 GCP regions      |
| Other Natural (NAT)            | -51.9              | 10.4                                 | 18 GCP regions      |

### S3 Supplementary figures

#### S3.1 Detailed sub-sectors $\delta^{13}\text{C}\text{-CH}_4$ source signature maps

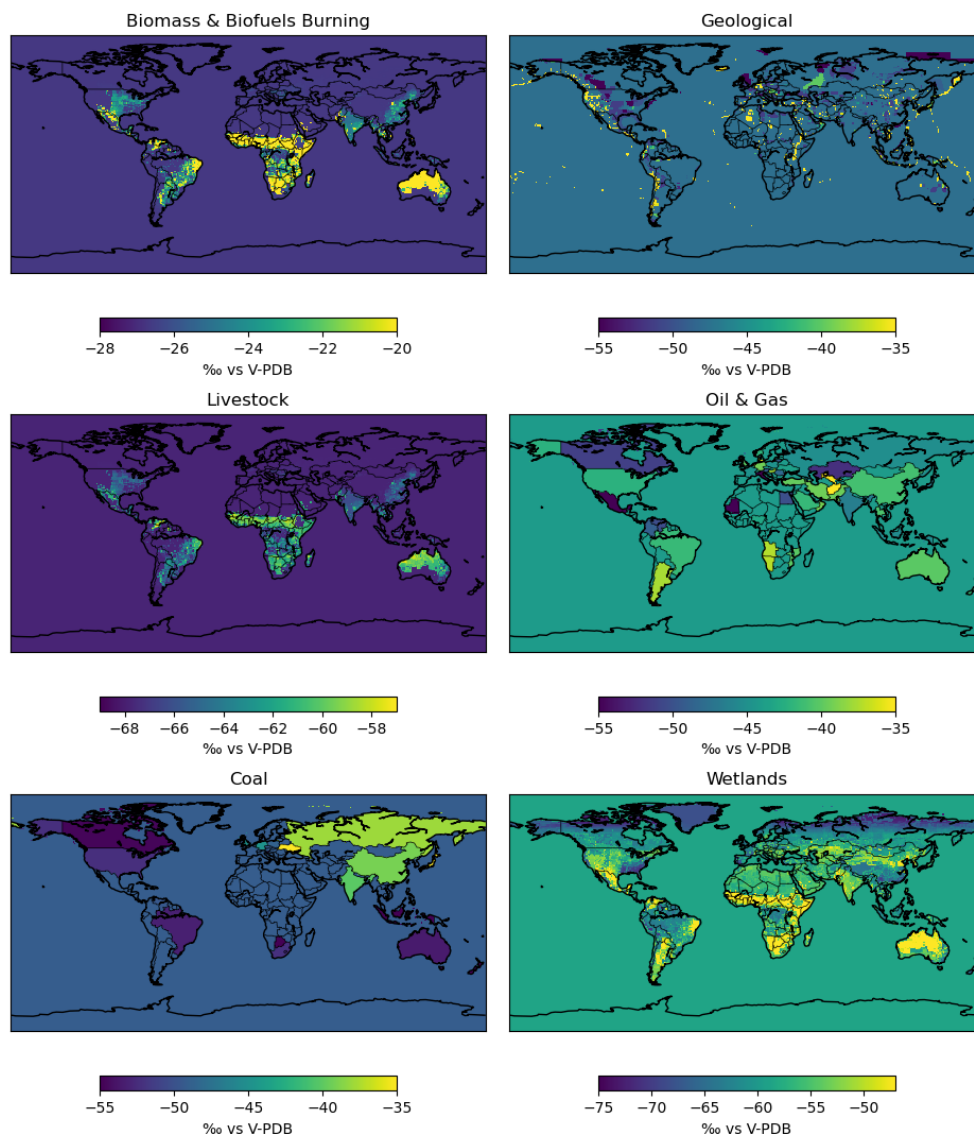

**Figure S1.** Maps of  $\delta^{13}\text{C}\text{-CH}_4$  subcategories, showing isotopic signatures by source subcategory. Sources for sector isotopic signatures are: Biomass – Biofuels Burning (Lan et al., 2021), Geological (Etiopie et al., 2019), Livestock (Lan et al., 2021), Oil and Gas (Lan et al., 2021; Menoud et al., 2022), Coal (Lan et al., 2021; Menoud et al., 2022), and Wetlands (Oh et al., 2022).

### S3.2 Detailed sub-sectors CH<sub>4</sub> emissions maps

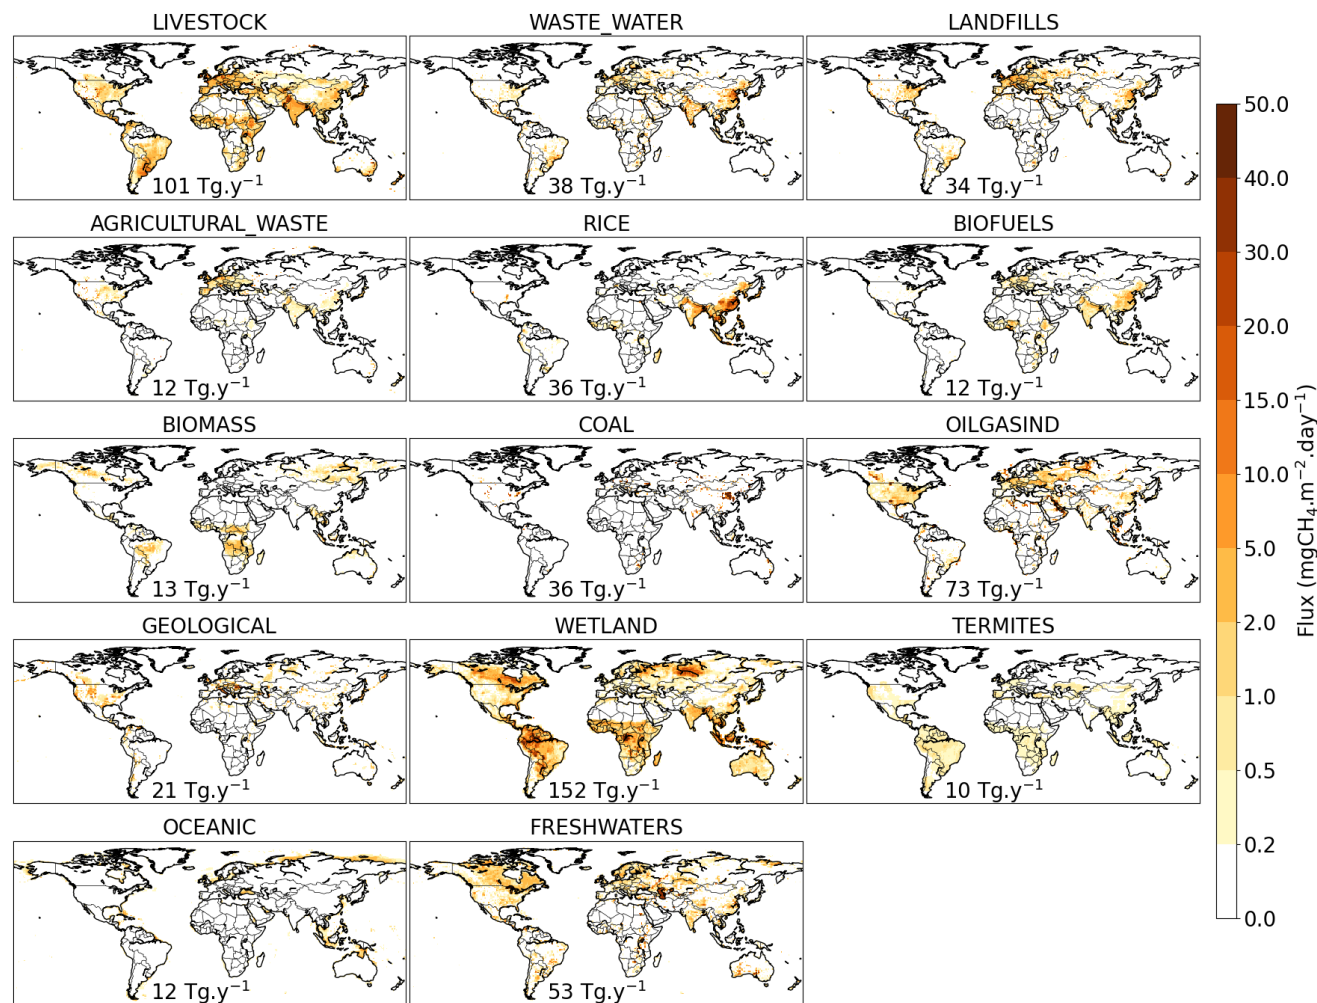

**Figure S2.** Mean methane emissions (1998–2022) for each sub-sector contributing to the five main CH<sub>4</sub> source sectors, expressed in mgCH<sub>4</sub> m<sup>-2</sup> day<sup>-1</sup>. Each panel shows the spatial distribution of the average flux over the 1998–2022 period, with the total subcategory emission (in Tg yr<sup>-1</sup>) indicated. Anthropogenic emissions (e.g., RICE, LANDFILLS, LIVESTOCK, WASTEWATER, AGRICULTURAL WASTE, BIOFUELS, COAL, OIL AND GAS) are from EDGARv8.0 (Crippa et al., 2023). Biomass burning emissions (BIOMASS) are derived from GFED4s (van Wees et al., 2022). Wetland emissions correspond to the climatological mean of 11 process-based models from the Global Methane Budget (GMB) (Martinez et al., 2024). Freshwater emissions are based on CH<sub>4</sub> flux maps from Stavert et al. (2022), with spatial rescaling following Martinez et al. (2024). Geological, termite, and oceanic emissions follow the GMB prior dataset, based respectively on Etiope et al. (2019), the S. Castaldi model for termites (Martinez et al., 2024), and oceanic emissions from Weber et al. (2019). All datasets were harmonised to a common 1° × 1° grid.

### S3.3 Sensitivity analysis

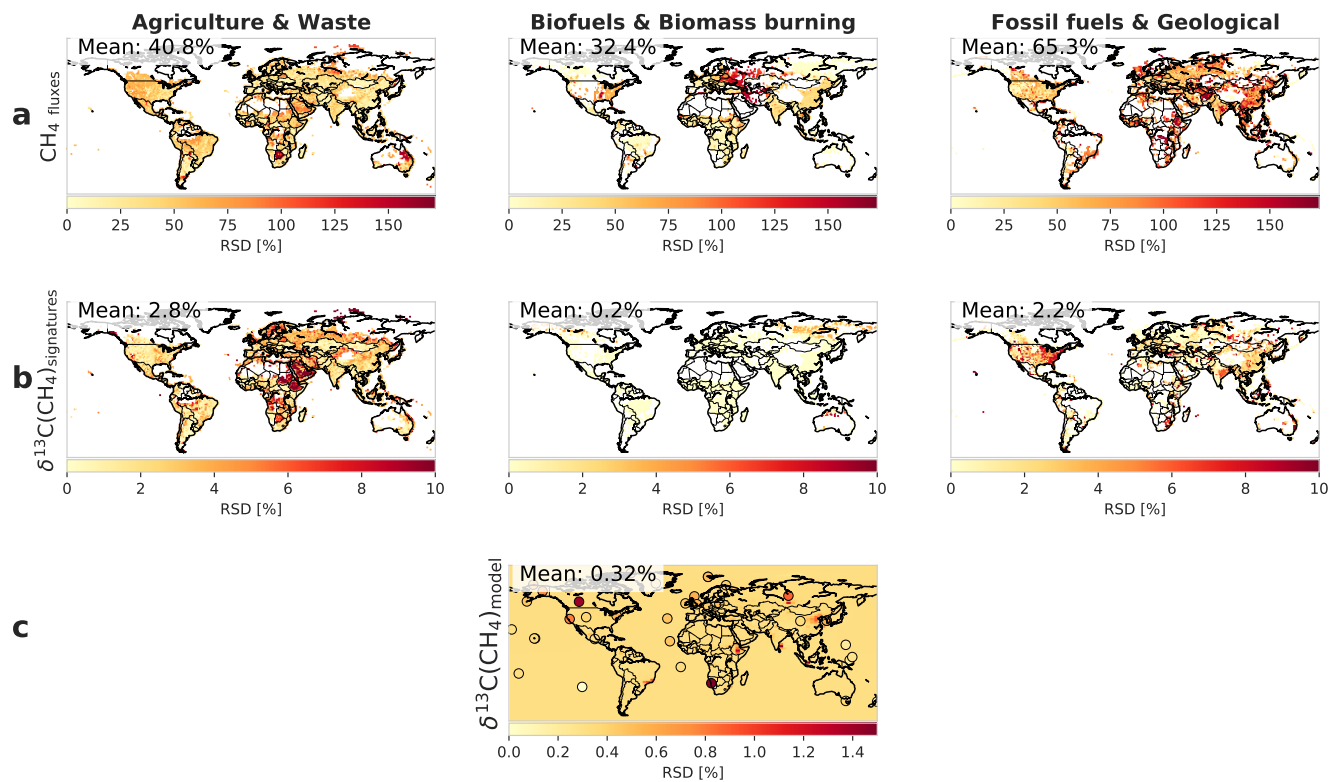

**Figure S3.** (a) RSD (in %) of the fluxes among different prior datasets (GAINSv4, CEDSv2021, GFEIv2, EDGARv8) (over 2016–2020) at surface level. Values are only displayed when the associated CH<sub>4</sub> flux is higher than  $0.2 \text{ mgCH}_4 \cdot \text{m}^{-2} \cdot \text{day}^{-1}$ , for aggregated categories. (b) RSD of the resulting  $\delta^{13}\text{C}(\text{CH}_4)$  source signature by aggregated category. (c) RSD of the  $\delta^{13}\text{C}(\text{CH}_4)$  signals from the forward model outputs at surface level. Coloured circles indicate RSD of observed  $\delta^{13}\text{C}(\text{CH}_4)$  values at each surface station over the study period.

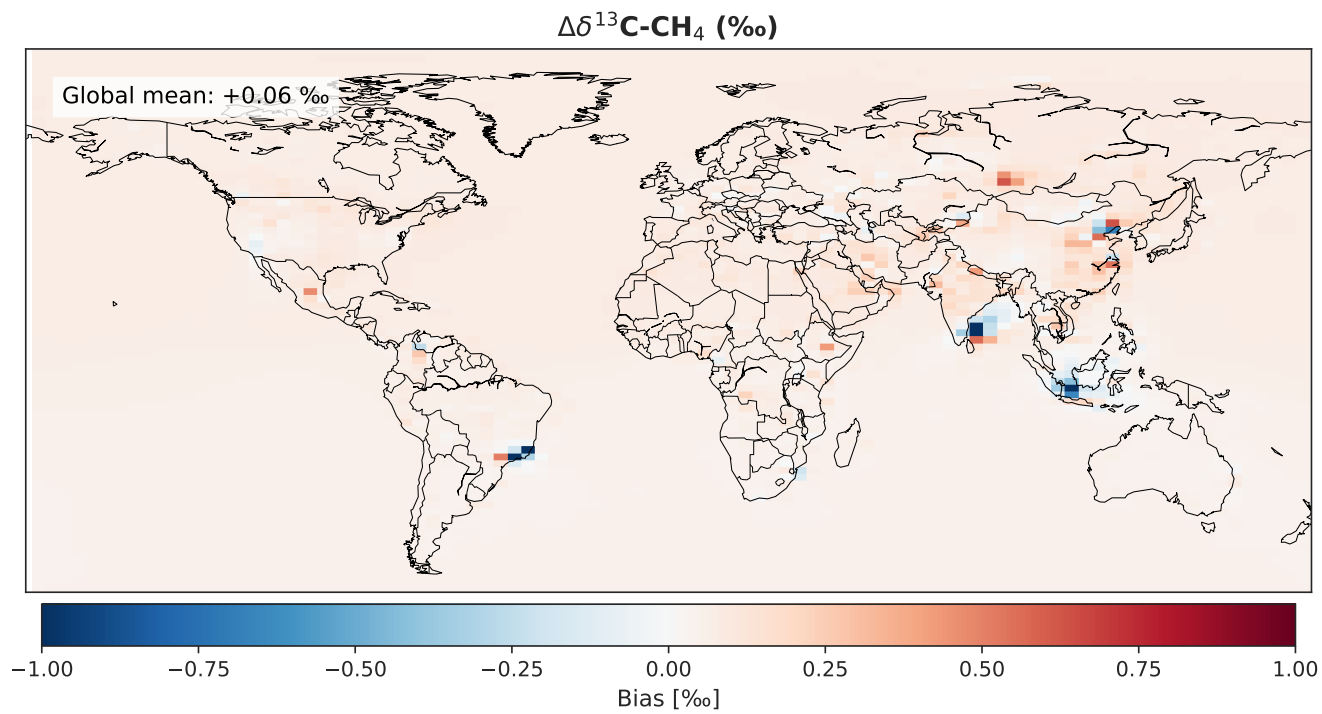

**Figure S4.** Difference maps between the NO\_AGGREG (14 categories) and the reference OH\_INCA simulation (5 categories) averaged over 2016–2020 at the surface level for  $\Delta\delta^{13}\text{C-CH}_4$  (‰).

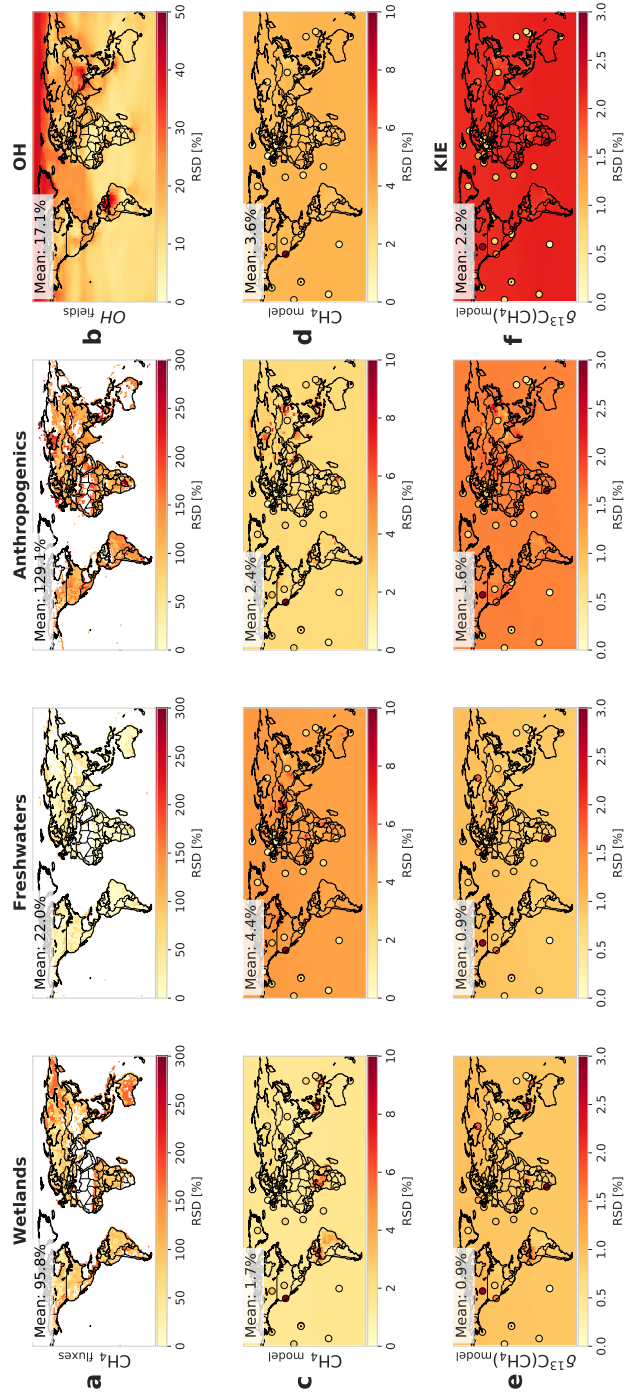

**Figure S5.** RSD (in %) over 2016–2020 at surface level. (a) RSD of  $\text{CH}_4$  emissions from wetlands, freshwaters, and anthropogenic sectors (AGW, FFG, BB). Values are only displayed when the associated  $\text{CH}_4$  flux exceeds  $0.2 \text{ mg CH}_4 \cdot \text{m}^{-2} \cdot \text{day}^{-1}$ . (b) RSD of the total tropospheric OH column (pressure levels below 250 hPa). (c) RSD of  $\text{CH}_4$  mole fractions at surface level from forward model outputs, driven by uncertainty in emission fluxes. Coloured circles indicate RSD of observed  $\text{CH}_4$  mole fractions at surface stations with co-located  $\delta^{13}\text{C}(\text{CH}_4)$  measurements. (d) Same as (c), but driven by uncertainty in OH fields. (e) RSD of  $\delta^{13}\text{C}-\text{CH}_4$  values at surface level from forward model outputs, driven by uncertainty in emission fluxes. Coloured circles indicate RSD of observed  $\delta^{13}\text{C}-\text{CH}_4$  values at the same stations. (f) Same as (e), but driven by uncertainty in kinetic isotope effects (KIE) during  $\text{CH}_4$  oxidation.

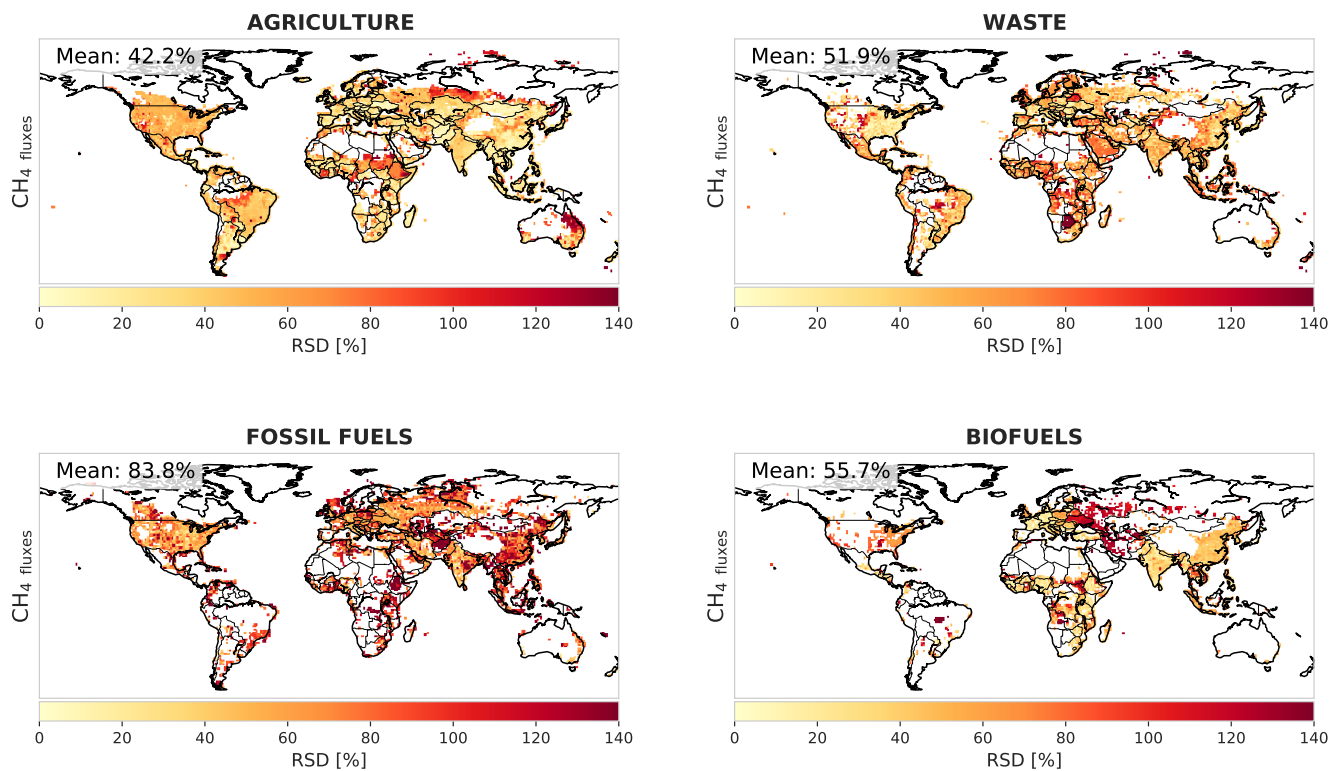

**Figure S6.** RSD (in %) of fluxes included in anthropogenics sector of annual mean CH<sub>4</sub> fluxes across four inventories (EDGARv8, CEDS, GAINS, GFEI) over (over 2016–2020), shown by emission sub-sector. Values are only displayed when the associated CH<sub>4</sub> flux is higher than  $0.2 \text{ mgCH}_4 \cdot \text{m}^{-2} \cdot \text{day}^{-1}$

**Sub-sector grouping used in this figure:**

*AGRICULTURE:* LIVESTOCK, RICE

*WASTE:* AGRICULTURAL\_WASTE, LANDFILLS, WASTE\_WATER

*FOSSIL FUELS:* COAL, OILGASIND

*BIOFUELS:* BIOFUELS

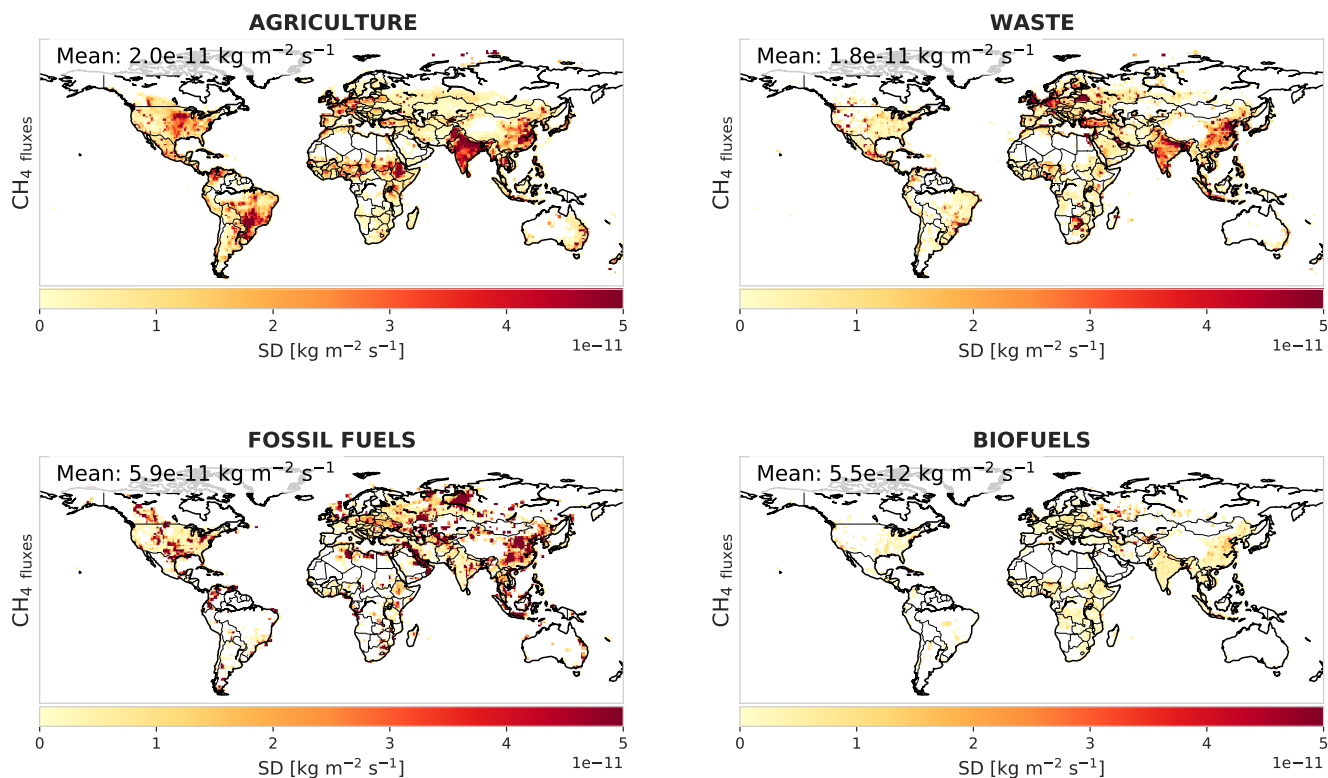

**Figure S7.** SD (in  $\text{kg} \cdot \text{m}^{-2} \cdot \text{s}^{-1}$ ) of fluxes included in the anthropogenic sector of annual mean CH<sub>4</sub> fluxes across four inventories (EDGARv8, CEDS, GAINS, GFEI) over 2016–2020, shown by emission sub-sector. Values are only displayed when the associated CH<sub>4</sub> flux is higher than  $0.2 \text{ mgCH}_4 \cdot \text{m}^{-2} \cdot \text{day}^{-1}$ .

**Sub-sector grouping used in this figure:**

*AGRICULTURE:* LIVESTOCK, RICE

*WASTE:* AGRICULTURAL\_WASTE, LANDFILLS, WASTE\_WATER

*FOSSIL FUELS:* COAL, OILGASIND

*BIOFUELS:* BIOFUELS

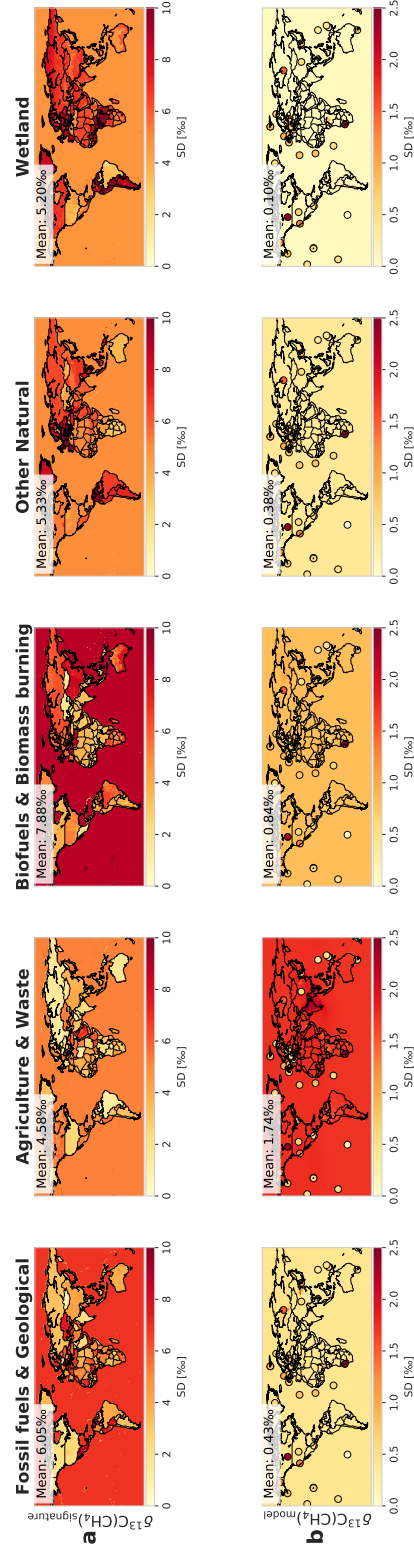

**Figure S8.** (a) RSD (in %) of the  $\delta^{13}\text{C}\text{-CH}_4$  source signature sensitivities inputs for Monte Carlo simulations, by sector, at surface level. (b) RSD of the  $\delta^{13}\text{C}\text{-CH}_4$  source signal from Monte Carlo simulations, by sector, at surface level. Coloured circles indicate RSD of observed  $\delta^{13}\text{C}\text{-CH}_4$  values at each surface station over the study period.

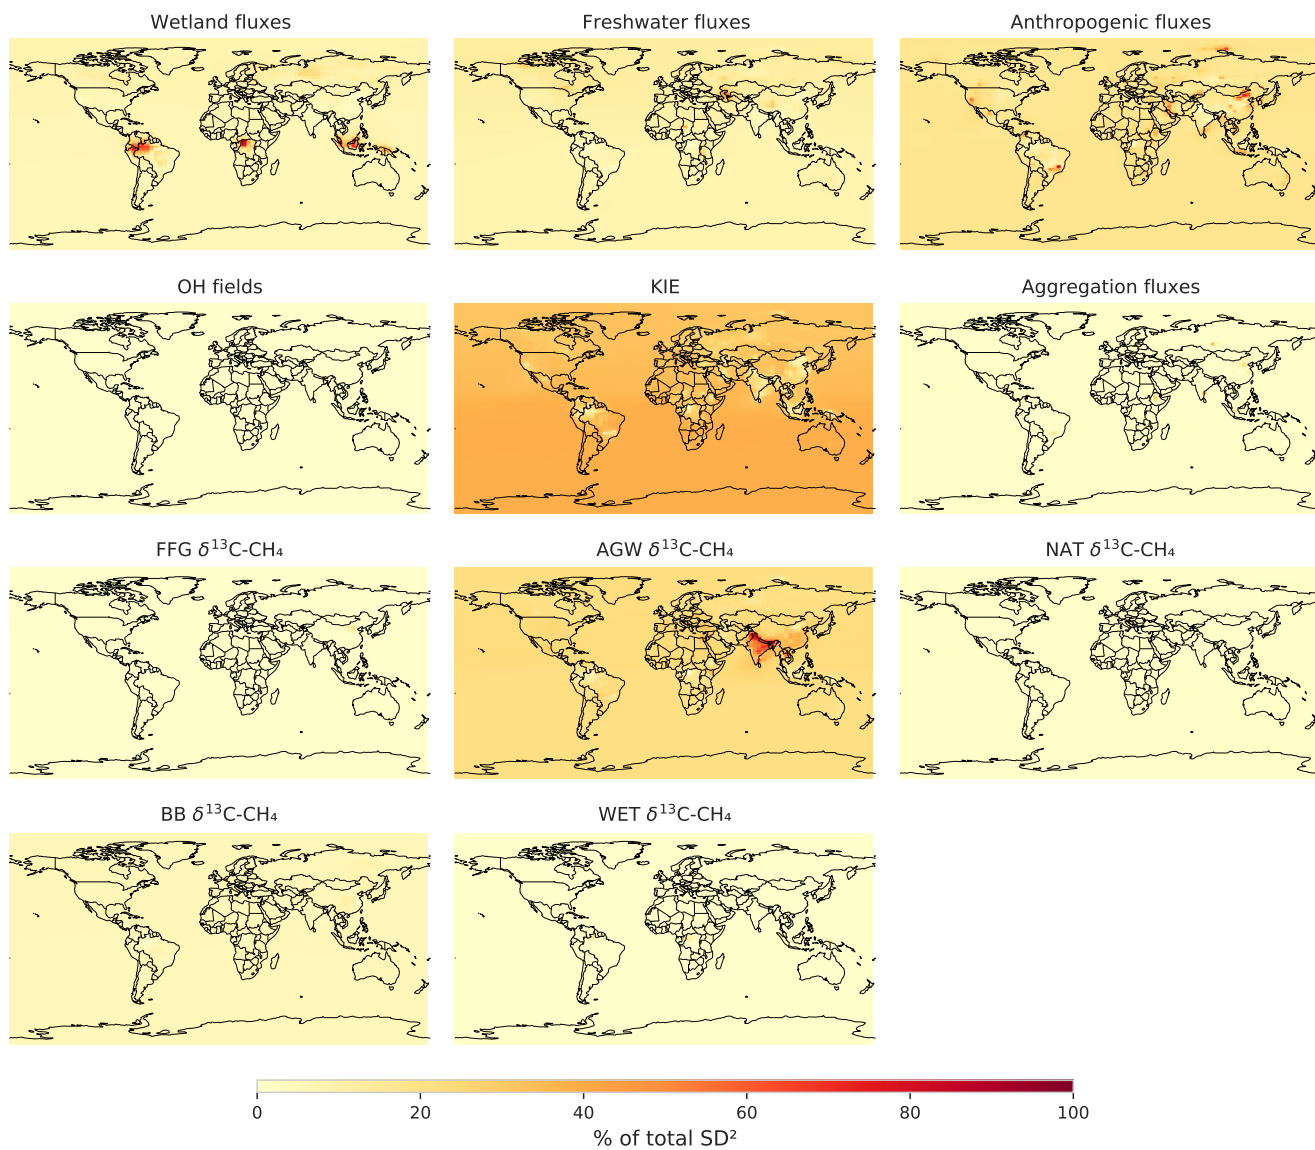

**Figure S9.** Relative contribution (in %) of each parameter to the total variance of simulated atmospheric  $\delta^{13}\text{C-CH}_4$  at each model grid cell. Each panel represents one sensitivity parameter tested. Colors indicate the percentage contribution of the squared standard deviation of each parameter to the total variance across all parameters. Values are calculated independently at each grid cell.

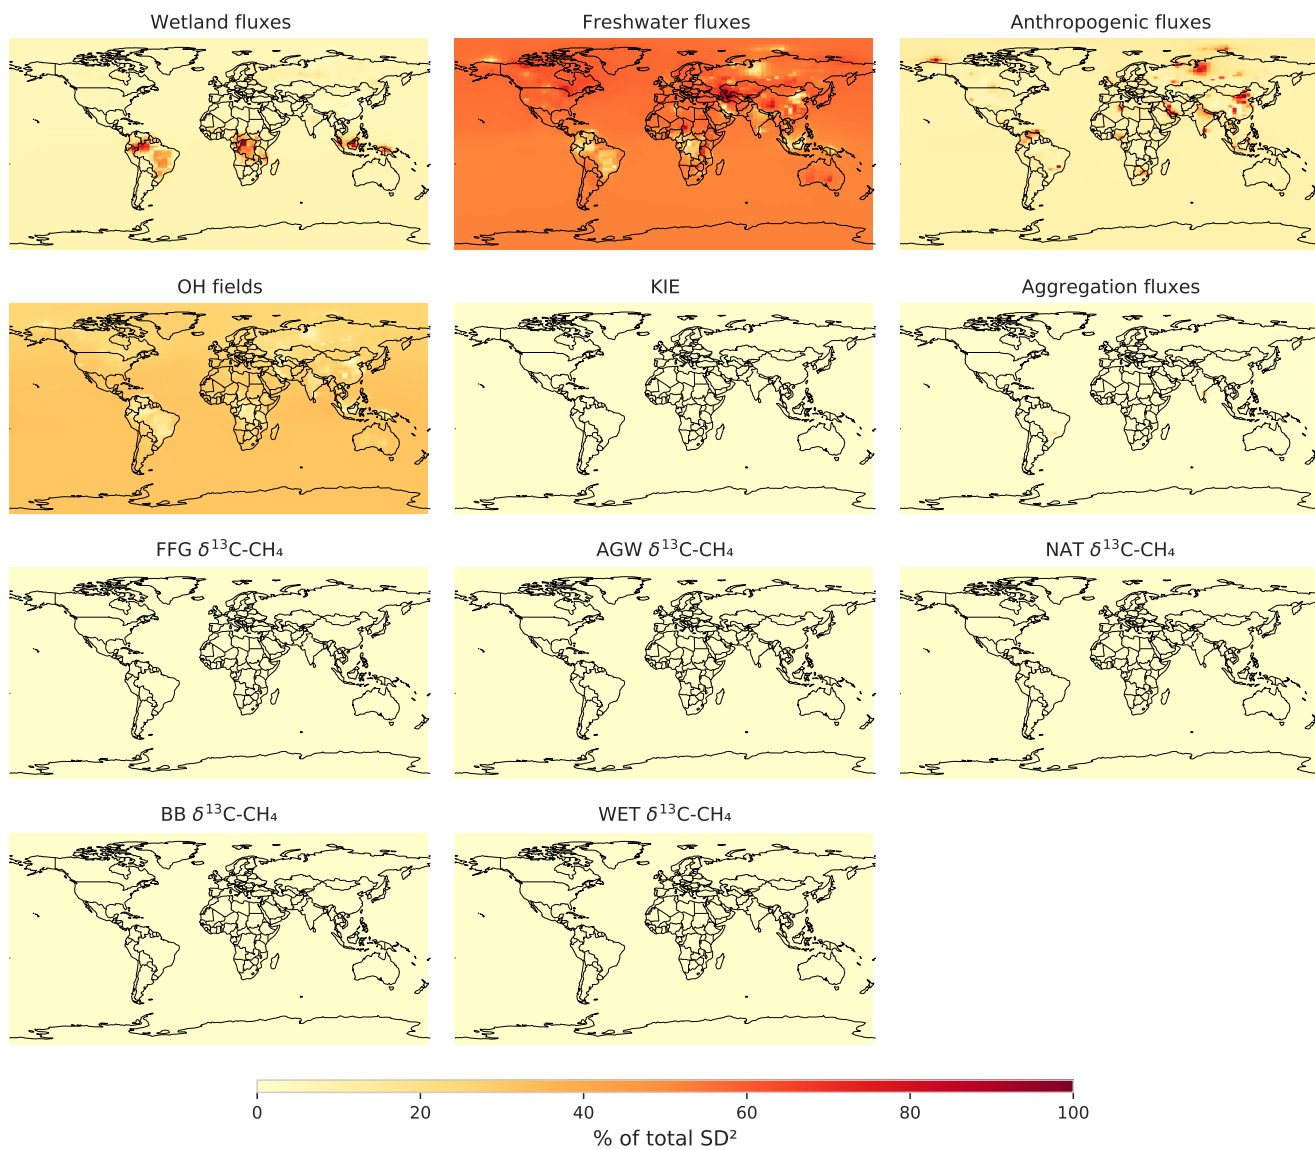

**Figure S10.** Relative contribution (in %) of each parameter to the total variance of simulated atmospheric CH<sub>4</sub> at each model grid cell. Each panel represents one sensitivity parameter tested. Colors indicate the percentage contribution of the squared standard deviation of each parameter to the total variance across all parameters. Values are calculated independently at each grid cell.

## S4.1 Globally averaged time series of the sensitivity simulations

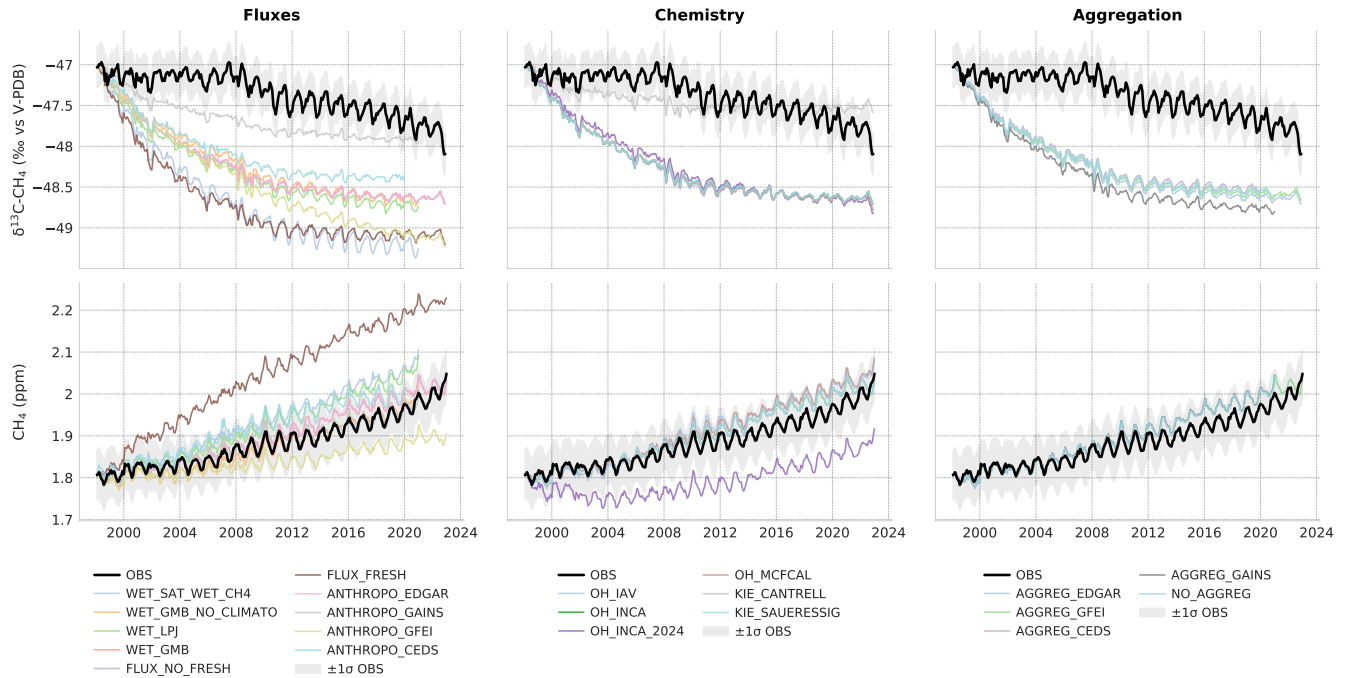

**Figure S11.** Globally averaged surface time series (1998–2022) of  $\delta^{13}\text{C-CH}_4$  signal (top row, % vs V-PDB) and  $\text{CH}_4$  mole fraction (bottom row, ppm) for all forward sensitivity simulations described in Table 3 of the main text, grouped by perturbation category: Fluxes (left), Chemistry (middle) and Aggregation (right). Black solid line: NOAA-INSTAAR globally averaged observations (Michel et al., 2024; Schuldt et al., 2025); grey shading:  $\pm 1\sigma$  observational uncertainty. Coloured lines correspond to the individual simulations (see legends for configuration details). Simulations based on GAINS and GFEI inventories end in 2020 due to data availability.

Figure S11 presents the globally averaged surface time series (1998–2022) of  $\text{CH}_4$  mole fractions (bottom row) and  $\delta^{13}\text{C-CH}_4$  signals (top row) for all forward sensitivity simulations listed in Table 3 of the main text, grouped by perturbation category: Fluxes (left column), Chemistry (middle column), and Aggregation (right column). The black solid line shows the NOAA-  
 45 INSTAAR globally averaged observations (Michel et al., 2024; Schuldt et al., 2025), and the grey shaded envelope represents the  $\pm 1\sigma$  observational uncertainty. Observations are provided here as a plausibility reference rather than a validation target: the simulations use prescribed fluxes and source signatures rather than posterior estimates from an inversion.

The inter-simulation spread is category-dependent. Aggregation simulations cluster tightly around a common trajectory for both  $\text{CH}_4$  and  $\delta^{13}\text{C-CH}_4$ , consistent with the limited impact of aggregation choices reported in Sect. 4.2.1 of the main  
 50 text. Chemistry simulations split into two groups in  $\delta^{13}\text{C-CH}_4$ : the KIE\_CANTRELL run remains systematically enriched compared to the KIE\_SAUERESSIG, consistent with the dominant sensitivity of the modeled isotopic signal to the OH-KIE

value (Table 6 of the main text); the OH\_INCA\_2024 run departs from the other OH configurations in CH<sub>4</sub>, reflecting the higher prescribed OH concentrations. Flux simulations display the widest spread overall, in particular ANTHROPO\_GFEI progressively diverging upward in CH<sub>4</sub> after 2008.

55 Most simulations remain within the observational envelope over the full period, supporting the realism of the prescribed input datasets for mainstream configurations. The outlier behaviour of KIE\_CANTRELL, OH\_INCA\_2024 and ANTHROPO\_GFEI illustrates that individual parameter choices, rather than the overall modeling framework, drive discrepancies with observations. The inter-simulation spread nonetheless reaches  $\sim 1.5\%$  in  $\delta^{13}\text{C-CH}_4$  and  $\sim 300$  ppb in CH<sub>4</sub> by the end of the period, confirming that forward simulations alone cannot reproduce observations without joint optimization of fluxes and isotopic source  
60 signatures within an inversion framework.

The model–observation offset is largest during the early simulation period and progressively stabilizes after approximately 2010–2015. This spin-up drift, particularly visible in  $\delta^{13}\text{C-CH}_4$  (Tans, 1997), and confirms that restricting the sensitivity analysis to the 2016–2020 window ensures a stationary regime across all simulations, isolating the effect of perturbed parameters from residual spin-up artifacts.

## 65 S4.2 Inter-hemispheric gradient diagnostic

As a complementary first-order diagnostic of the realism of the modeled fields, Figure S12 compares the inter-hemispheric gradient (NH–SH, computed as the difference between the latitudinally averaged Northern and Southern Hemisphere surface signals) for both CH<sub>4</sub> and  $\delta^{13}\text{C-CH}_4$ , averaged over the analysis window 2016–2019. The inter-hemispheric gradient is a particularly stringent test as it isolates the joint contribution of the spatial distribution of sources, inter-hemispheric transport and  
70 oxidation chemistry, while being insensitive to absolute calibration offsets and to long-term spin-up drift. NOAA-INSTAAR observations (Michel et al., 2024; Schuldt et al., 2025) are processed identically to the simulations, using the same set of surface stations.

For CH<sub>4</sub>, the observed gradient ( $\sim 0.117$  ppb) falls well within the spread of simulations (0.10–0.14 ppb). The reference configuration (OH\_INCA / KIE\_SAUERESSIG / EDGAR / GMB\_Mean) reproduces the observed value to within  $\sim 5\%$ ,  
75 supporting the realism of the prescribed flux distribution at hemispheric scale. The strongest deviations are found for ANTHROPO\_GFEI (low gradient, consistent with its underestimated NH emissions) and FLUX\_FRESH (higher gradient, reflecting the addition of freshwater fluxes predominantly located in the Northern Hemisphere).

For  $\delta^{13}\text{C-CH}_4$ , all simulations systematically underestimate the magnitude of the observed gradient ( $-0.32\%$  observed vs.  $-0.15$  to  $-0.25\%$  simulated). This residual bias is fully consistent with the dominant uncertainty drivers identified in our  
80 sensitivity analysis: the OH kinetic isotope effect and the agriculture and waste source signatures (Sect. 4.3.1 of the main text), which jointly control the partitioning of  $^{13}\text{C}$  between the two hemispheres. The ranking of simulations also matches expectations: WET\_GMB\_NO\_CLIMATO and WET\_SAT\_WET\_CH4 produce the most negative gradients (closest to observations) thanks to a stronger seasonal contribution from boreal wetlands, while the NO\_AGGREG, AGGREG\_GFEI and ANTHROPO\_EDGAR runs produce the weakest gradients. This residual bias does not undermine the realism of the dataset,  
85 but rather reinforces the methodological recommendations formulated in Sect. 4.3.2: in isotopic inversions, OH-KIE and AGW

source signatures must be either explicitly optimized or sampled within an ensemble framework, since their prescribed values drive a systematic structural bias in the modeled inter-hemispheric isotopic gradient.

We emphasize that this diagnostic is a plausibility reference rather than a formal validation. Forward simulations alone cannot disentangle biases on fluxes from biases on isotopic source signatures, and only joint optimization within an inversion  
90 framework would allow rigorous validation. The diagnostics provided in Figures S11 and S12 therefore demonstrate that the dataset produces a realistic mean state and inter-hemispheric structure for CH<sub>4</sub>, while explicitly identifying where the remaining work is needed for  $\delta^{13}\text{C-CH}_4$ . Inversion-based validation will be the subject of a follow-up study.

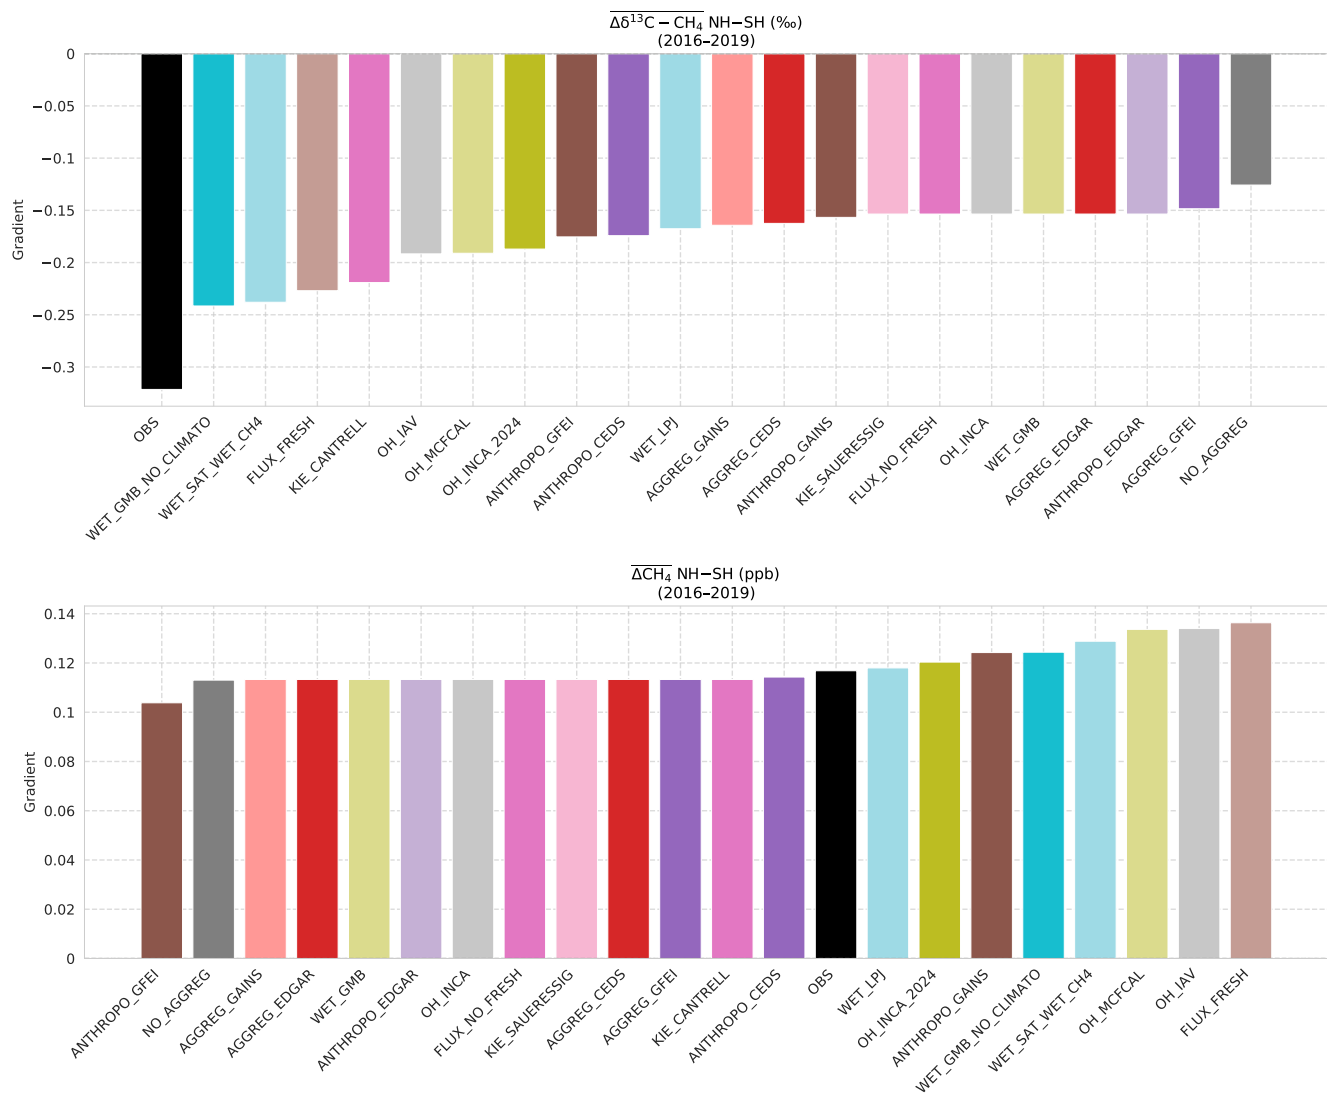

**Figure S12.** Inter-hemispheric gradient (NH-SH) of  $\delta^{13}\text{C}-\text{CH}_4$  (top, ‰ vs V-PDB) and  $\text{CH}_4$  (bottom, ppb) averaged over 2016–2019, for all forward sensitivity simulations described in Table 3 of the main text and for NOAA-INSTAAR observations (Michel et al., 2024; Schuldt et al., 2025) (black bar). Simulations are sorted by increasing gradient. The NH-SH gradient is computed from monthly surface fields, taking the difference between the latitudinally averaged Northern Hemisphere ( $0^\circ$ – $90^\circ\text{N}$ ) and Southern Hemisphere ( $90^\circ\text{S}$ – $0^\circ$ ) signals at the locations of NOAA-INSTAAR surface stations, and then averaged over 2016–2019.

## References

- Camin, F., Besic, D., Brewer, P. J., Allison, C. E., Coplen, T. B., Dunn, P. J. H., Gehre, M., Gröning, M., Meijer, H. A. J., Hélie, J.-F., Iacumin, P., Kraft, R., Krajnc, B., Kümmel, S., Lee, S., Meija, J., Mester, Z., Mohn, J., Moossen, H., Qi, H., Skrzypek, G., Sperlich, P., Viallon, J., Wassenaar, L. I., and Wielgosz, R. I.: Stable Isotope Reference Materials and Scale Definitions—Outcomes of the 2024 IAEA Experts Meeting, *Rapid Communications in Mass Spectrometry*, 39, e10018, <https://doi.org/10.1002/rcm.10018>, 2025.
- Craig, H.: Isotopic Standards for Carbon and Oxygen and Correction Factors for Mass-Spectrometric Analysis of Carbon Dioxide, *Geochimica et Cosmochimica Acta*, 12, 133–149, [https://doi.org/10.1016/0016-7037\(57\)90024-8](https://doi.org/10.1016/0016-7037(57)90024-8), 1957.
- Crippa, M., Guizzardi, D., Schaaf, E., Monforti-Ferrario, F., Quadrelli, R., Risquez Martin, A., Rossi, S., Vignati, E., Muntean, M., Brandao De Melo, J., Oom, D., Pagani, F., Banja, M., Taghavi-Moharamli, P., Köykkä, J., Grassi, G., Branco, A., and San-Miguel, J.: GHG Emissions of All World Countries: 2023, Publications Office of the European Union, ISBN 978-92-68-07550-0, 2023.
- Etiopie, G., Ciotoli, G., Schwietzke, S., and Schoell, M.: Gridded Maps of Geological Methane Emissions and Their Isotopic Signature, *Earth System Science Data*, 11, 1–22, <https://doi.org/10.5194/essd-11-1-2019>, 2019.
- Höglund-Isaksson, L., Gómez-Sanabria, A., Klimont, Z., Rafaj, P., and Schöpp, W.: Technical Potentials and Costs for Reducing Global Anthropogenic Methane Emissions in the 2050 Timeframe –Results from the GAINS Model, *Environmental Research Communications*, 2, 025 004, <https://doi.org/10.1088/2515-7620/ab7457>, 2020.
- Lan, X., Basu, S., Schwietzke, S., Bruhwiler, L. M. P., Dlugokencky, E. J., Michel, S. E., Sherwood, O. A., Tans, P. P., Thoning, K., Etiopie, G., Zhuang, Q., Liu, L., Oh, Y., Miller, J. B., Pétron, G., Vaughn, B. H., and Crippa, M.: Improved Constraints on Global Methane Emissions and Sinks Using  $\delta^{13}\text{C-CH}_4$ , *Global Biogeochemical Cycles*, 35, e2021GB007 000, <https://doi.org/10.1029/2021GB007000>, 2021.
- Martinez, A., Saunio, M., Poulter, B., Bousquet, P., Canadell, J. G., Jackson, R. B., Dlugokencky, E. J., Ciais, P., Bastviken, D., Blake, D. R., Castaldi, S., Etiopie, G., Gedney, N., Höglund-Isaksson, L., Hugelius, G., Ito, A., Kleinen, T., Krummel, P. B., Liu, L., McDonald, K. C., Melton, J. R., Müller, J., Murguia-Flores, F., Niwa, Y., Noce, S., Parker, R. J., Peng, C., Ramonet, M., Riley, W. J., Rosentreter, J. A., Segers, A., Smith, S. J., Tian, H., Tubiello, F. N., Tsuruta, A., Weber, T. S., van der Werf, G. R., Worthy, D., Yoshida, Y., Zhang, W., Zhang, Z., Zheng, B., Zhu, Q., Zhu, Q., and Zhuang, Q.: Supplemental Data of the Global Carbon Project Methane Budget 2024 V1, <https://doi.org/10.18160/GKQ9-2RHT>, 2024.
- Menoud, M., van der Veen, C., Lowry, D., Fernandez, J. M., Bakkaloglu, S., France, J. L., Fisher, R. E., Maazallahi, H., Stanisavljević, M., Nečki, J., Vinkovic, K., Łakomic, P., Rinne, J., Korbeň, P., Schmidt, M., Defratyka, S., Yver-Kwok, C., Andersen, T., Chen, H., and Röckmann, T.: New Contributions of Measurements in Europe to the Global Inventory of the Stable Isotopic Composition of Methane, *Earth System Science Data*, 14, 4365–4386, <https://doi.org/10.5194/essd-14-4365-2022>, 2022.
- Menoud, M., Thomas, R., Carina, v. d. V., Julianne, F., Semra, B., Dave, L., James, F., Rebecca, F., Hossein, M., Piotr, K., Martina, S., Mila, S., Jaroslaw, N., Patryk, Ł., Janne, R., Sara, D., Camille, Y.-K., Katarina, V., Truls, A., and Huilin, C.: The European Methane Isotope Database Coupled with a Global Inventory of Fossil and Non-Fossil  $\delta^{13}\text{C-}$  and  $\delta^2\text{H-CH}_4$  Source Signature Measurements, <https://doi.org/10.24416/UU01-YP43IN>, 2024.
- Michel, S. E., Lan, X., Miller, J., Tans, P., Clark, J. R., Schaefer, H., Sperlich, P., Brailsford, G., Morimoto, S., Moossen, H., and Li, J.: Rapid Shift in Methane Carbon Isotopes Suggests Microbial Emissions Drove Record High Atmospheric Methane Growth in 2020–2022, *Proceedings of the National Academy of Sciences*, 121, e2411212 121, <https://doi.org/10.1073/pnas.2411212121>, 2024.

- Oh, Y., Zhuang, Q., Welp, L. R., Liu, L., Lan, X., Basu, S., Dlugokencky, E. J., Bruhwiler, L., Miller, J. B., Michel, S. E., Schwietzke, S., Tans, P., Ciais, P., and Chanton, J. P.: Improved Global Wetland Carbon Isotopic Signatures Support Post-2006 Microbial Methane Emission Increase, *Communications Earth & Environment*, 3, 1–12, <https://doi.org/10.1038/s43247-022-00488-5>, 2022.
- 130 O'Rourke, P., Smith, S., Mott, A., Ahsan, H., McDuffie, E., Crippa, M., Klimont, Z., McDonald, B., Wang, S., Nicholson, M., Hoesly, R., and Feng, L.: CEDS V\_2021\_04\_21 Gridded Emissions Data, <https://doi.org/10.25584/PNNLDATAHUB/1779095>, 2021.
- Saunois, M., Stavert, A. R., Poulter, B., Bousquet, P., Canadell, J. G., Jackson, R. B., Raymond, P. A., Dlugokencky, E. J., Houweling, S., Patra, P. K., Ciais, P., Arora, V. K., Bastviken, D., Bergamaschi, P., Blake, D. R., Brailsford, G., Bruhwiler, L., Carlson, K. M., Carrol, M., Castaldi, S., Chandra, N., Crevoisier, C., Crill, P. M., Covey, K., Curry, C. L., Etiope, G., Frankenberg, C., Gedney, N., Heggin, M. I., Höglund-Isaksson, L., Hugelius, G., Ishizawa, M., Ito, A., Janssens-Maenhout, G., Jensen, K. M., Joos, F., Kleinen, T., Krummel, P. B., Langenfelds, R. L., Laruelle, G. G., Liu, L., Machida, T., Maksyutov, S., McDonald, K. C., McNorton, J., Miller, P. A., Melton, J. R., Morino, I., Müller, J., Murguía-Flores, F., Naik, V., Niwa, Y., Noce, S., O'Doherty, S., Parker, R. J., Peng, C., Peng, S., Peters, G. P., Prigent, C., Prinn, R., Ramonet, M., Regnier, P., Riley, W. J., Rosentreter, J. A., Segers, A., Simpson, I. J., Shi, H., Smith, S. J., Steele, L. P., Thornton, B. F., Tian, H., Tohjima, Y., Tubiello, F. N., Tsuruta, A., Viovy, N., Voulgarakis, A., Weber, T. S., van Weele, M., van der Werf, G. R., Weiss, R. F., Worthy, D., Wunch, D., Yin, Y., Yoshida, Y., Zhang, W., Zhang, Z., Zhao, Y., Zheng, B., Zhu, Q., Zhu, Q., and Zhuang, Q.: The Global Methane Budget 2000–2017, *Earth System Science Data*, 12, 1561–1623, <https://doi.org/10.5194/essd-12-1561-2020>, 2020.
- 135 Saunois, M., Martinez, A., Poulter, B., Zhang, Z., Raymond, P. A., Regnier, P., Canadell, J. G., Jackson, R. B., Patra, P. K., Bousquet, P., Ciais, P., Dlugokencky, E. J., Lan, X., Allen, G. H., Bastviken, D., Beerling, D. J., Belikov, D. A., Blake, D. R., Castaldi, S., Crippa, M., Deemer, B. R., Dennison, F., Etiope, G., Gedney, N., Höglund-Isaksson, L., Holgerson, M. A., Hopcroft, P. O., Hugelius, G., Ito, A., Jain, A. K., Janardanan, R., Johnson, M. S., Kleinen, T., Krummel, P. B., Lauerwald, R., Li, T., Liu, X., McDonald, K. C., Melton, J. R., Mühle, J., Müller, J., Murguía-Flores, F., Niwa, Y., Noce, S., Pan, S., Parker, R. J., Peng, C., Ramonet, M., Riley, W. J., Rocher-Ros, G., Rosentreter, J. A., Sasakawa, M., Segers, A., Smith, S. J., Stanley, E. H., Thanwerdas, J., Tian, H., Tsuruta, A., Tubiello, F. N., Weber, T. S., van der Werf, G. R., Worthy, D. E. J., Xi, Y., Yoshida, Y., Zhang, W., Zheng, B., Zhu, Q., Zhu, Q., and Zhuang, Q.: Global Methane Budget 2000–2020, *Earth System Science Data*, 17, 1873–1958, <https://doi.org/10.5194/essd-17-1873-2025>, 2025.
- 140 Scarpelli, T. R., Jacob, D. J., Grossman, S., Lu, X., Qu, Z., Sulprizio, M. P., Zhang, Y., Reuland, F., Gordon, D., and Worden, J. R.: Updated Global Fuel Exploitation Inventory (GFEI) for Methane Emissions from the Oil, Gas, and Coal Sectors: Evaluation with Inversions of Atmospheric Methane Observations, *Atmospheric Chemistry and Physics*, 22, 3235–3249, <https://doi.org/10.5194/acp-22-3235-2022>, 2022.
- 155 Schudt, K. N., Aalto, T., Aaltonen, H., Arlyn Andrews, Apadula, F., Arnold, S., Bäni, L., Bartyzel, J., Bergamaschi, P., Biermann, T., Biraud, S. C., Pierre-Eric Blanc, Brunner, D., Van Den Bulk, P., Francescopiero Calzolari, Huilin Chen, Lukasz Chmura, Coletta, J. D., Colomb, A., Condori, L., Conen, F., Conil, S., Couret, C., Cristofanelli, P., Cuevas, E., Delmotte, M., Ankur Desai, Elsasser, M., Emmenegger, L., Forster, G., Frumau, A., Fuente-Lastra, M., Galkowski, M., Francois Gheusi, Hammer, S., Haszpra, L., Hatakka, J., Heliasz, M., Heltai, D., Henne, S., Hensen, A., Hermans, C., Hermansen, O., Hoheisel, A., Holst, J., Di Iorio, T., Jaffe, D. A., Karion, A., Kazan, V., Keronen, P., Kneuer, T., Kolari, P., Kominkova, K., Kubistin, D., Kumps, N., Lan, X., Lanza, A., Laurent, O., Lee, J., Lehner, I., Lehtinen, K., Leskinen, A., Leuenberger, M., Levin, I., Levula, J., Lindauer, M., Lindroth, A., Mikael Ottosson Löfvenius, Lopez, M., Lunder, C. R., Mammarella, I., Manca, G., Marek, M. V., Marklund, P., De Mazière, M., McKain, K., Meinhardt, F., Jean-Marc Metzger, Miller, C. E., Miller, J. B., Mölder, M., Müller-Williams, J., Myhre, C. L., Jaroslaw Necki, Noe, S. M., O'Doherty, S., Peltola, O., Philippon, C., Piacentino, S., Pichon, J. M., Pickers, P., Pitt, J., Plass-Dülmer, C., Platt, S. M., Ramonet, M., Louis-Jeremy Rigouneau, Rivas, P. P.,
- 160

- Yves-Alain Roulet, Di Sarra, A. G., Scheeren, B., Schmidt, M., Schumacher, M., Sha, M. K., Sloop, C. D., Smith, P. D., Sørensen, L. L., Steger, D., Steinbacher, M., Sweeney, C., Taipale, R., Thoning, K., Trisolino, P., Vermeulen, A., Viner, B., Vitkova, G., Weyrauch, D., Worthy, D., Xueref-Remy, I., Yver-Kwok, C., and Mirosław Zimnoch: Multi-Laboratory Compilation of Atmospheric Carbon Dioxide Data for the Year 2024; obspack\_ch4\_1\_NRT\_v7.1\_2025-01-31, <https://doi.org/10.25925/20250115>, 2025.
- 170 Stavert, A. R., Saunio, M., Canadell, J. G., Poulter, B., Jackson, R. B., Regnier, P., Lauerwald, R., Raymond, P. A., Allen, G. H., Patra, P. K., Bergamaschi, P., Bousquet, P., Chandra, N., Ciais, P., Gustafson, A., Ishizawa, M., Ito, A., Kleinen, T., Maksyutov, S., McNorton, J., Melton, J. R., Müller, J., Niwa, Y., Peng, S., Riley, W. J., Segers, A., Tian, H., Tsuruta, A., Yin, Y., Zhang, Z., Zheng, B., and Zhuang, Q.: Regional Trends and Drivers of the Global Methane Budget, *Global Change Biology*, 28, 182–200, <https://doi.org/10.1111/gcb.15901>, 2022.
- 175 Tans, P. P.: A Note on Isotopic Ratios and the Global Atmospheric Methane Budget, *Global Biogeochemical Cycles*, 11, 77–81, <https://doi.org/10.1029/96GB03940>, 1997.
- van Wees, D., van der Werf, G. R., Randerson, J. T., Rogers, B. M., Chen, Y., Veraverbeke, S., Giglio, L., and Morton, D. C.: Global Biomass Burning Fuel Consumption and Emissions at 500&thinspm Spatial Resolution Based on the Global Fire Emissions Database (GFED), *Geoscientific Model Development*, 15, 8411–8437, <https://doi.org/10.5194/gmd-15-8411-2022>, 2022.
- 180 Weber, T., Wiseman, N. A., and Kock, A.: Global Ocean Methane Emissions Dominated by Shallow Coastal Waters, *Nature Communications*, 10, 4584, <https://doi.org/10.1038/s41467-019-12541-7>, 2019.
